# Supplementary material for: Cobalt oxide nanoparticles embedded in flexible carbon nanofibers: attractive material for supercapacitor electrodes and CO2 adsorption
Source: Royal Society of Chemistry journal article supplement (doi:10.1039/c6ra06077c), 2016-01-01
Supplement: c6ra06077c3.pdf [file c6ra06077c3.pdf]

## Supporting Information

### **Cobalt Oxide Nanoparticles Embedded in Flexible Carbon Nanofibers: Attractive Material for Supercapacitors Electrodes and CO<sub>2</sub> Adsorption**

Nousheen Iqbal,<sup>ac</sup> Xianfeng Wang,<sup>\*abc</sup> Jianlong Ge,<sup>bc</sup> Jianyong Yu,<sup>c</sup> an Hak-Yong Kim<sup>d</sup>, Salem S. Al-Deyab,<sup>\*e</sup> Mohamed El-Newehy<sup>f</sup>, and Bin Ding<sup>\*abc</sup>

<sup>a</sup> State Key Laboratory for Modification of Chemical Fibers and Polymer Materials, College of Materials Science and Engineering, Donghua University, Shanghai 201620, China.

<sup>b</sup> Key Laboratory of Textile Science & Technology, Ministry of Education, College of Textiles, Donghua University, Shanghai 201620, China.

<sup>c</sup> Nanofibers Research Centre, Modern Textile Institute, Donghua University, Shanghai 200051, China

<sup>d</sup> Department of BIN Fusion Technology, Chonbuk National University, Jeonju 561-756, Republic of Korea.

<sup>e</sup> Petrochemical Research Chair, Department of Chemistry, College of Science, King Saud University, Riyadh 11451, Saudi Arabia.

<sup>f</sup> Department of Chemistry, Faculty of Science, Tanta University, Tanta 31527, Egypt

**\*Corresponding author at:** Key Laboratory of High Performance Fibers & Products, Ministry of Education, College of Materials Science and Engineering, Donghua University, Shanghai 201620, China. Key Laboratory of Textile Science & Technology, Ministry of Education, College of Textiles, Donghua University, Shanghai 201620, China. Tel: +86-21-62378202.

**E-mail addresses:** [binding@dhu.edu.cn](mailto:binding@dhu.edu.cn) (B. Ding), [wxf@dhu.edu.cn](mailto:wxf@dhu.edu.cn) (X. Wang), [ssdeyab@ksu.edu.sa](mailto:ssdeyab@ksu.edu.sa) (S. Al-Deyab)

**Notes:** The authors declare no competing financial interest.

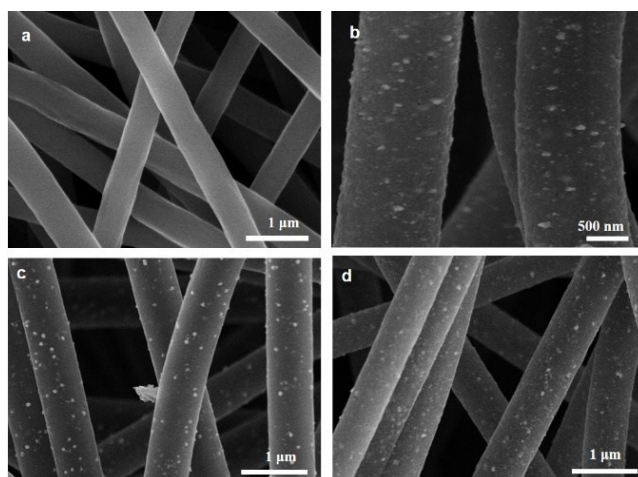

**Fig. S1** FE-SEM images of CNFs derived from precursor fibers with different salts contents of (a) 0, (b) 2, (c) 3, and (d) 4 wt.%.

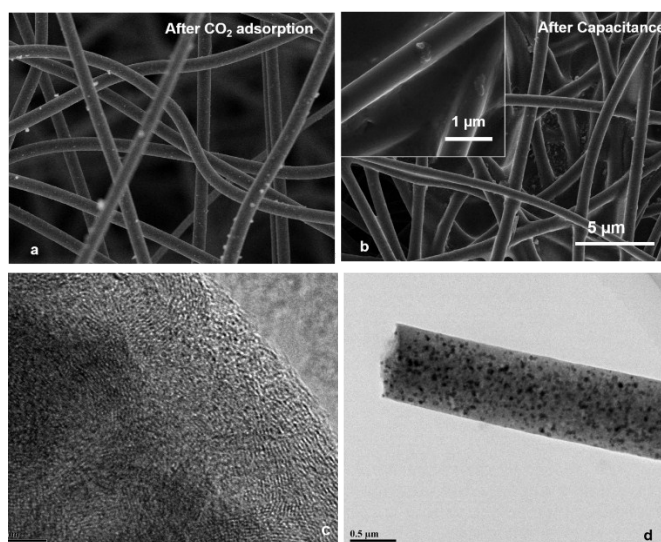

**Fig. S2** FE-SEM and HR-TEM images of CNFs with optimized salts content after measuring supercapacitance and CO<sub>2</sub> adsorption.

FE-SEM and HR-TEM images show no significant change on morphology and internal structure after measuring properties of optimized samples after supercapacitance and CO<sub>2</sub> adsorption performance.

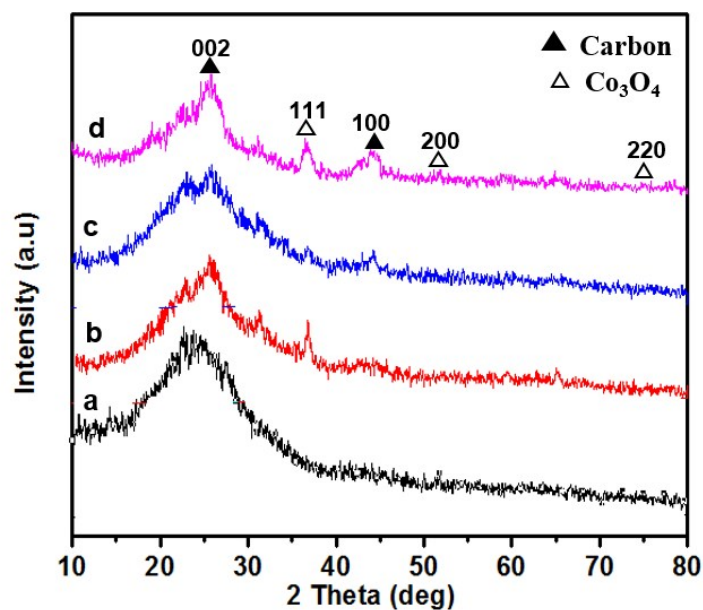

**Fig. S3** Representative XRD patterns of CNFs derived from precursor fibers with salts contents of (a) 0, (b) 2, (c) 3, and (b) 4 wt.%.

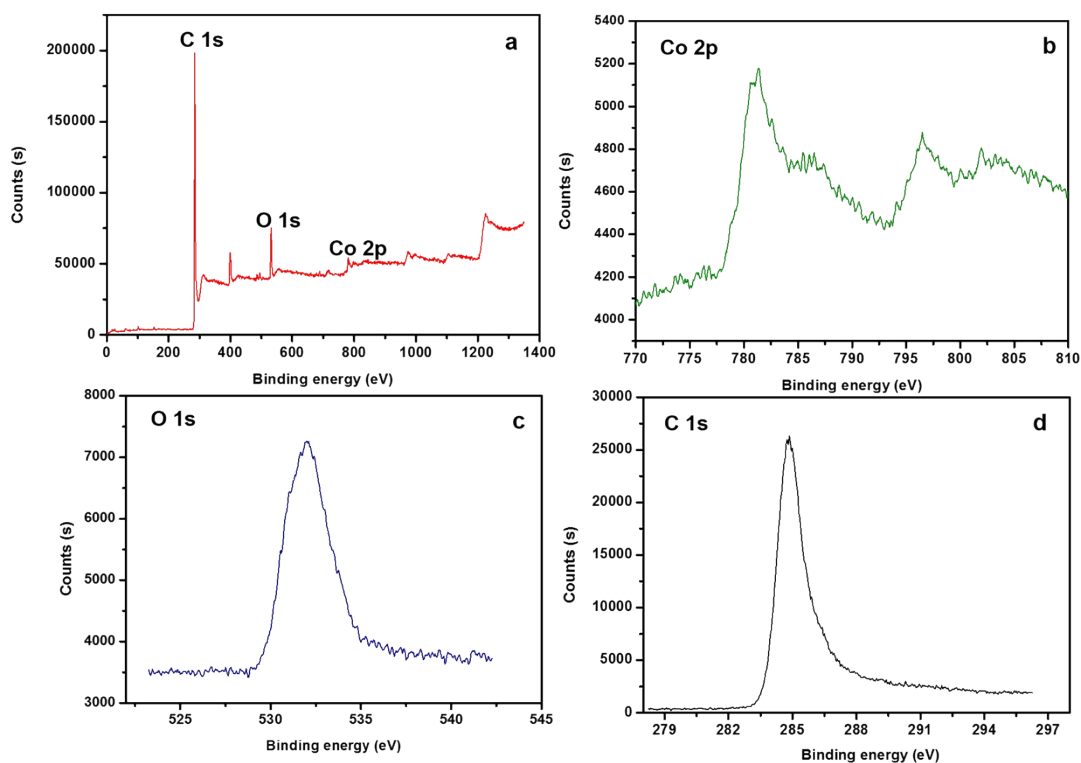

**Fig. S4** High-resolution XPS spectra of (a) CNF-Co-4, (b) Co 2p, (c) O 1s, and, (d) O 1s.

### S5. Preparation of PVA/H<sub>2</sub>SO<sub>4</sub> Gel Electrolytes

Typically, the PVA/H<sub>2</sub>SO<sub>4</sub> solution was prepared by blending PVA with 30 ml water and then add H<sub>2</sub>SO<sub>4</sub> then mixed solution and put in oil bath at 85 °C for 3 h with stirring and after that on 85°C without stirring at weight ratio of 1:1. This mixed solution were then put for the evaporation of water.

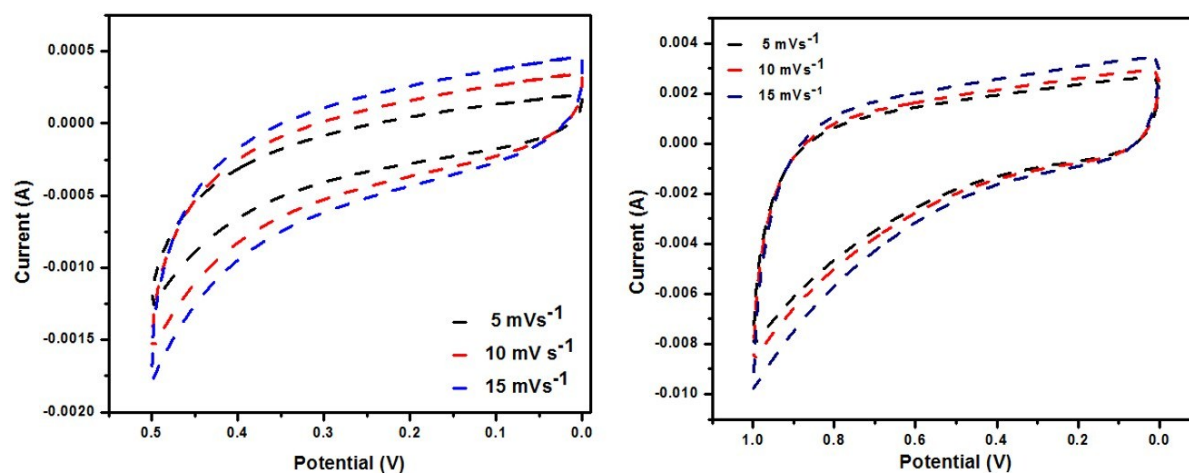

**Fig. S6** Cyclic voltammetry of CNFs derived from precursor fibers with 2 and 3% salts content. As seen from the CV curves of the CNFs-Co-2 the electrochemical response current at a scan rate of 5,10 and 15 mV<sup>-1</sup>, suggest the SC of the membrane itself shows SC of 380, 298, and 236 F g<sup>-1</sup>.

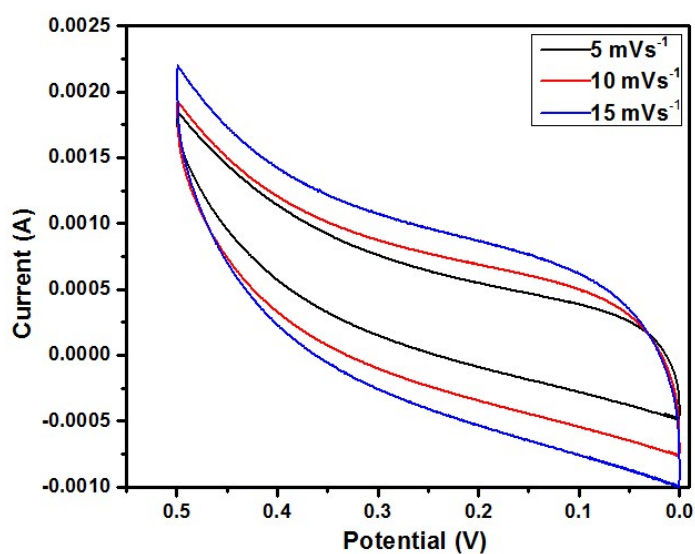

**Fig. S7** Cyclic voltammetry of CNFs derived from precursor fibers with 0% salts content.

As seen from the CV curves of the CNFs film (**Fig. S4**), the little electrochemical response current and the small areas integrated below the zero-current line, even at a scan rate of 5  $\text{mV}^{-1}$  at  $0.5 \text{ Ag}^{-1}$ , suggest the low SC of the pure CNFs membrane itself. Pure CNFs shows 183, 98, and 67  $\text{F/g}$  at 5, 10 and 15  $\text{mVs}^{-1}$ .

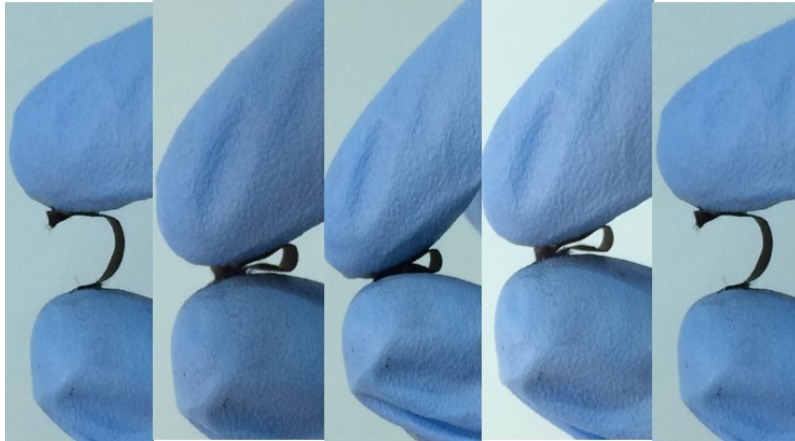

**Movie#1.** Movie images presenting the robust flexibility of CNFs-Co-2 membranes (see movie).

**Movie# 2.** Movie of pure CNFs.
